# Supplementary material for: The fabrication of oriented organic–inorganic ultrathin films with enhanced electrochromic properties
Source: Royal Society of Chemistry journal article supplement (doi:10.1039/c6tc02177h), 2016-01-01
Supplement: c6tc02177h1.pdf [file c6tc02177h1.pdf]

# Electronic Supplementary Material (ESI) for Journal of Materials Chemistry C

# This journal is © The Royal Society of Chemistry 2016

## Fabrication of oriented organic-inorganic ultrathin films with enhanced electrochromic property

Awu Zhou,<sup>a</sup> Xiaoxi Liu,<sup>a</sup> Yibo Dou,<sup>b</sup> Shanyue Guan,<sup>a</sup> Jingbin Han<sup>\*a</sup> and Min Wei<sup>a</sup>

*a. State Key Laboratory of Chemical Resource Engineering, Beijing University of Chemical Technology, Beijing 100029, P. R. China*

*b. Beijing Key Laboratory for Green Catalysis and Separation, Department of Chemistry and Chemical Engineering, Beijing University of Technology, Beijing 100124, P. R. China.*

### CORRESPONDING AUTHOR FOOTNOTE

\* Corresponding author. Phone: +86-10-64412131. Fax: +86-10-64425385.

E-mail: [hanjb@mail.buct.edu.cn](mailto:hanjb@mail.buct.edu.cn)

### Supplementary Figures

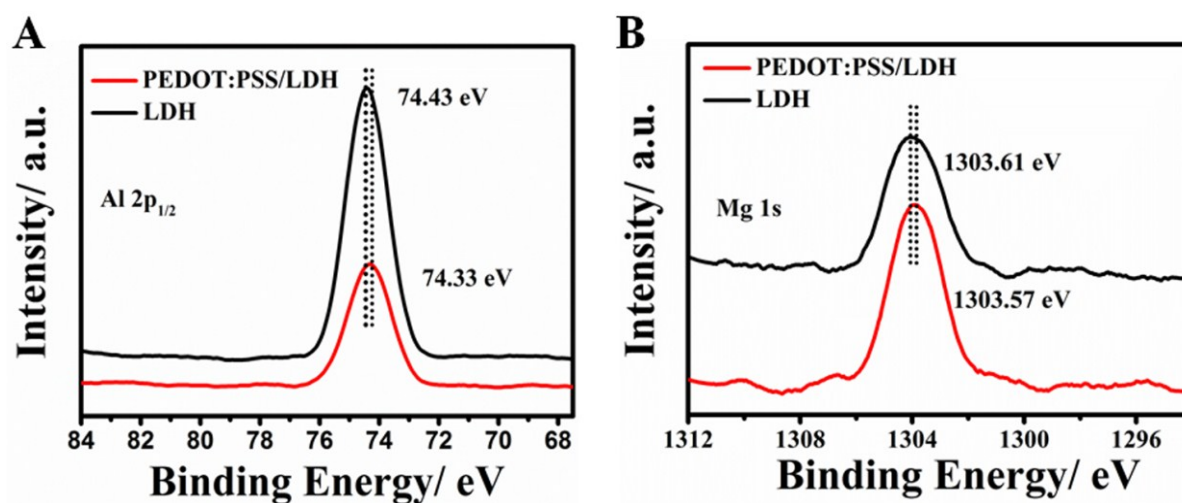

**Fig. S1** (A) Al 2p<sub>1/2</sub> and (B) Mg 1s XPS spectra for (PEDOT:PSS/LDH)<sub>n</sub> UTFs (red curve) and LDH (black curve).

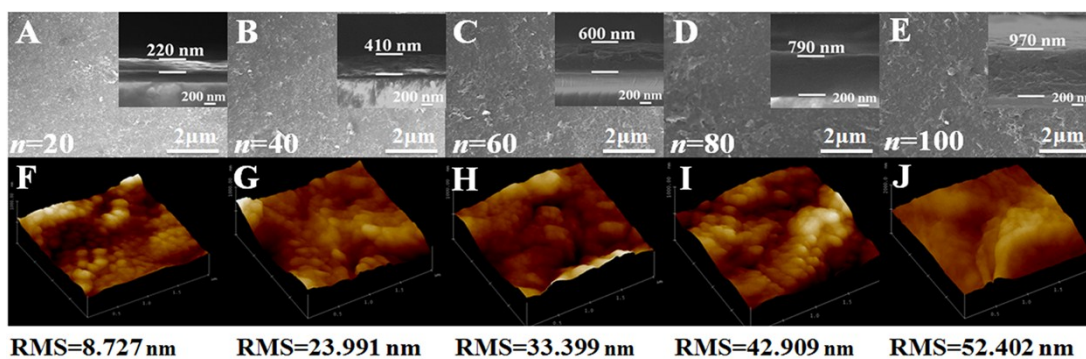

**Fig. S2** (A) ~ (E) Top view and side view (inset) of SEM images for the (PEDOT:PSS/LDH)<sub>n</sub> UTFs. (F) ~ (J) AFM images (2 μm × 2 μm) of the (PEDOT:PSS/LDH)<sub>n</sub> UTFs. *n*=20, 40, 60, 80, 100, respectively.

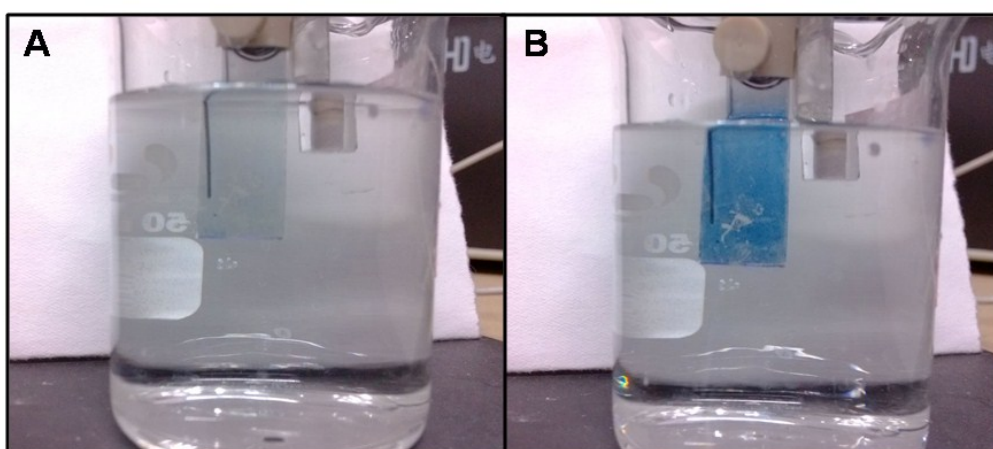

**Fig. S3** Photographs of (PEDOT:PSS/LDH)<sub>80</sub> UTF: (A) oxidized at 1 V and (B) reduced at -1 V.

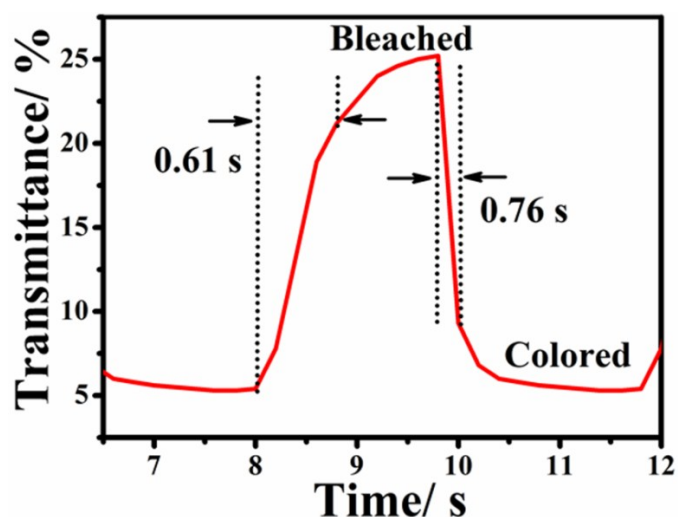

**Fig. S4** Optical transmittance of spin-coated PEDOT:PSS film versus time between 1 V and -1 V at 650 nm.

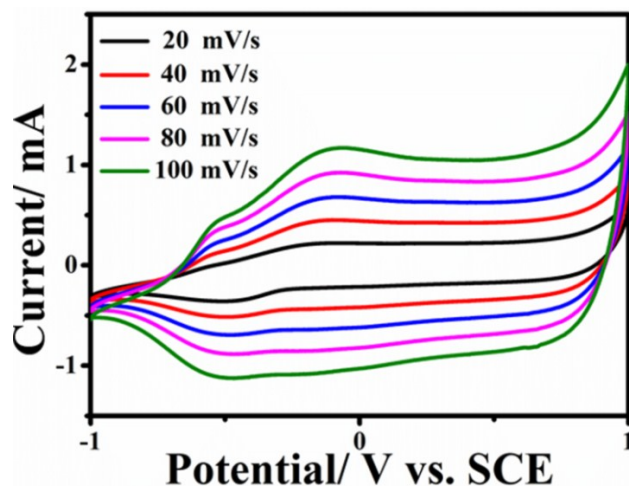

**Fig. S5** CV curves of (PEDOT:PSS/LDH)<sub>80</sub>/ITO with scan rate ranging from 0.02 to 0.1 V s<sup>-1</sup> in 0.1 M LiClO<sub>4</sub>/PC electrolyte.

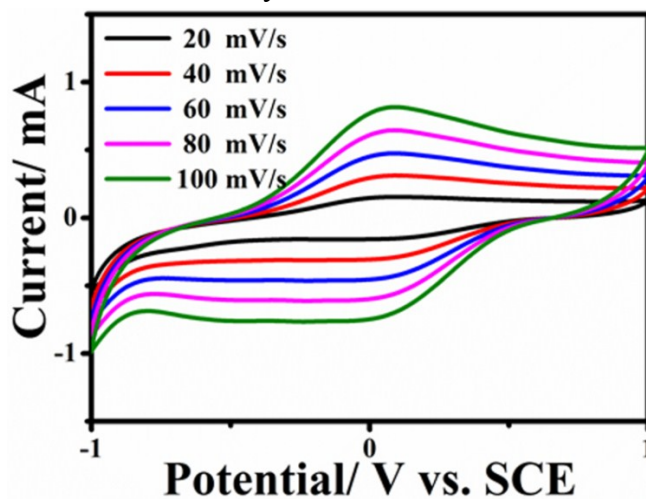

**Fig. S6** CV curves of spin-coated PEDOT:PSS/ITO film with scan rate ranging from 0.02 to 0.1 V s<sup>-1</sup> in 0.1 M LiClO<sub>4</sub>/PC electrolyte.

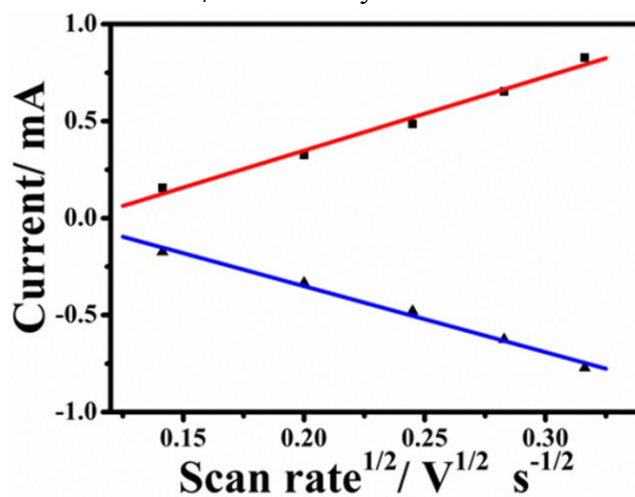

**Fig. S7** The cathodic/anodic peak current as a function of the square root of scan rate for the spin-coated PEDOT:PSS/ITO film.

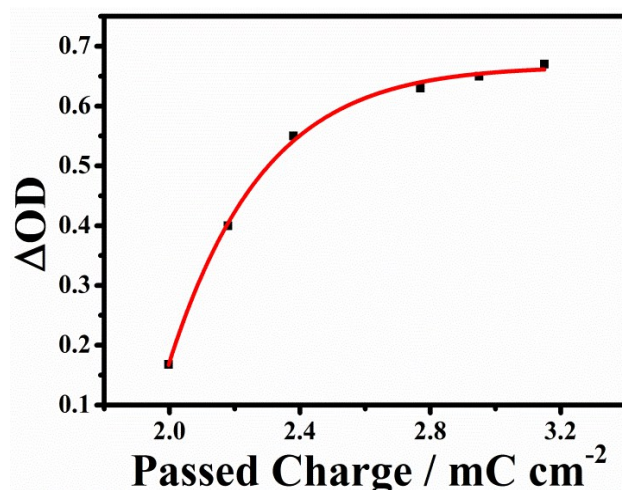

**Fig. S8** Optical density ( $\Delta OD = \log[T_b/T_c]$ ) of spin-coated PEDOT:PSS/ITO film as a function of passed charge ( $Q$ ).

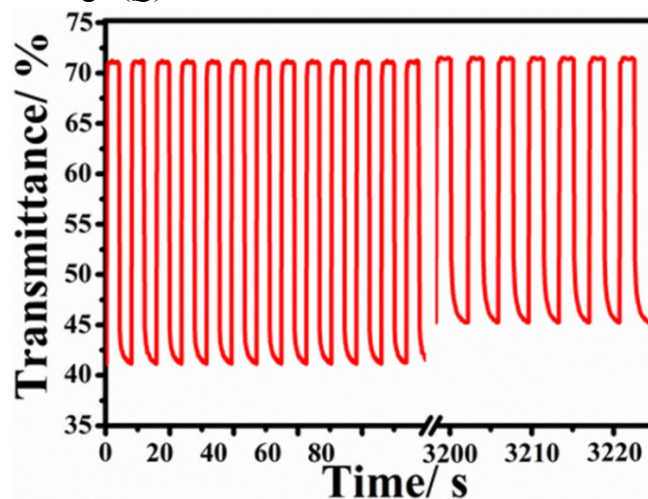

**Fig. S9** Optical transmittance of  $(\text{PEDOT:PSS/LDH})_{80}$  UTF versus time between 1 V and -1 V at 650 nm (in 0.1 M LiClO<sub>4</sub>/PC).

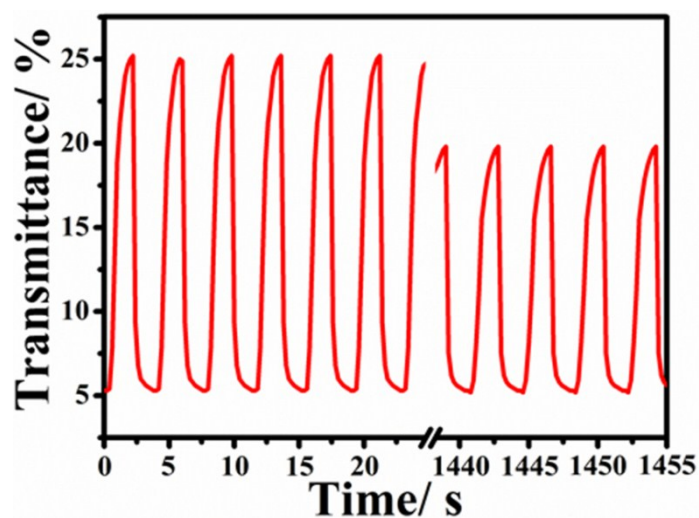

**Fig. S10** Optical transmittance of spin-coated PEDOT:PSS film versus time between 1 V and -1 V at 650 nm (in 0.1 M LiClO<sub>4</sub>/PC).

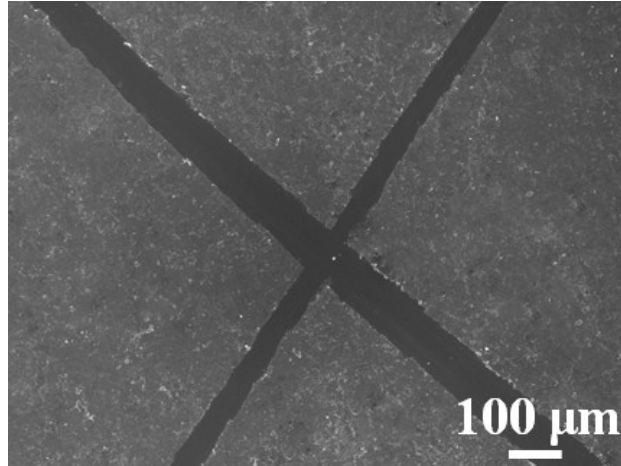

**Fig. S11** Top-view SEM image of the (PEDOT:PSS/LDH)<sub>80</sub> film on ITO glass upon scratching after 400-cycle electrochemical measurements in 0.1 M LiClO<sub>4</sub>/PC solution.

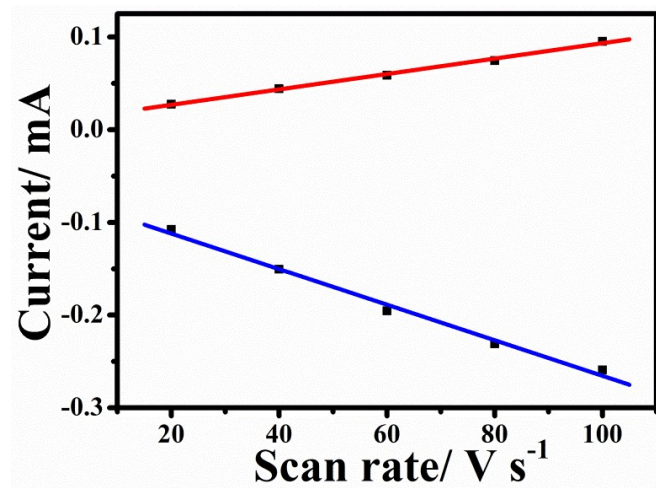

**Fig. S12** The cathodic/anodic peak current as a function of the scan rate for the (PEDOT:PSS/LDH)<sub>80</sub>|LiClO<sub>4</sub>-PC|ITO device.
